# Supplementary material for: Evaluation of the Pharmacokinetic Drug Interaction of Capmatinib With Itraconazole and Rifampicin and Potential Impact on Renal Transporters in Healthy Subjects
Source: PubMed Central journal article supplement — J Clin Pharmacol. 2022 Nov 2;63(2):228–38. doi: 10.1002/jcph.2153 (PMC10092221; doi:10.1002/jcph.2153), 2022-11-02
Supplement: JCPH-63-228-s004.pdf [file JCPH-63-228-s004.pdf]

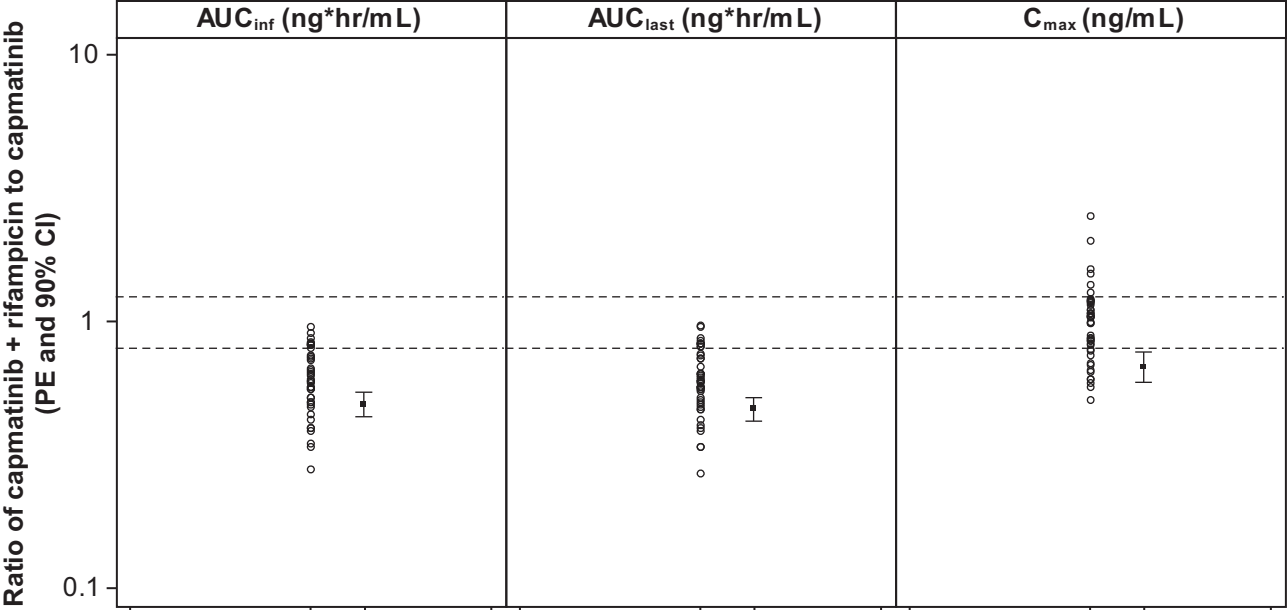

Point Estimate (PE) and 90% CI come from the model:  $\log(PK) = \text{treatment} + \text{subject}$  where subject is a random effect.

Reference lines are at 0.80 and 1.25. The Reference treatment was capmatinib 400 mg. The Test treatment was capmatinib 400 mg + rifampicin 600 mg.
